# Supplementary material for: Electrospun hollow ZnO/NiO heterostructures with enhanced photocatalytic activity
Source: Royal Society of Chemistry journal article supplement (doi:10.1039/c5ra08903d), 2015-01-01
Supplement: c5ra08903d1.pdf [file c5ra08903d1.pdf]

## Supporting Information

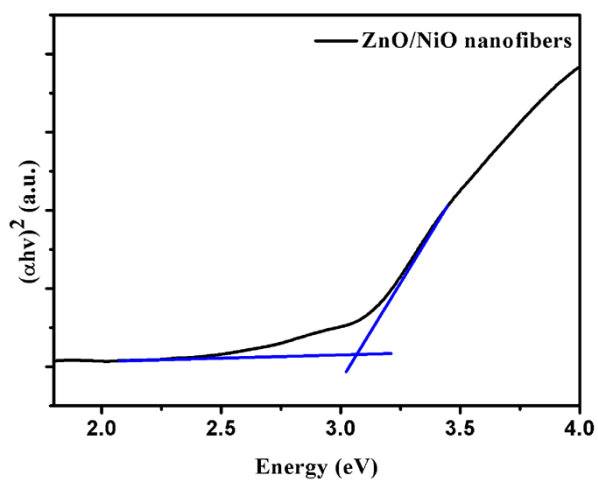

Fig.S1. the plots of the  $(\alpha h\nu)^2$  vs photon energy ( $h\nu$ ) for ZnO/NiO nanofibers.
